# Supplementary material
Source: PubMed Central journal article supplement (PMC3785120)
Supplement: supp_blood-2013-05-503250_blood-2013-05-503250-1.pdf [file supp_blood-2013-05-503250_blood-2013-05-503250-1.pdf]

## **Supplementary Methods:**

**Cell isolation.** Spleen and lymph nodes (axillary, inguinal) were removed from mice and gently meshed in DMEM containing 10% FBS to prepare for single cell suspensions. CD4<sup>+</sup>CD25<sup>+</sup>Tregs and CD4<sup>+</sup>CD25<sup>-</sup> T cells were isolated by the CD4<sup>+</sup>CD25<sup>+</sup> regulatory T cell isolation kit (Miltenyi Biotec) according to manufacturer's instruction. The purity of CD4<sup>+</sup>CD25<sup>-</sup> and CD4<sup>+</sup>CD25<sup>+</sup> subpopulations were around 90% and 80-85%, respectively. Splenic macrophages and DCs were isolated through positive selection by CD11b and CD11c microbeads kit (Miltenyi Biotec), respectively.

**Cell culture experiments,** CD4<sup>+</sup>CD25<sup>-</sup> naïve T cells were cultured with soluble anti-CD3 antibody (0.5 µg/ml) and T-cell-depleted splenocytes as antigen presenting cells (APCs) or with plated bound anti-CD3 and soluble anti-CD28 antibodies in the presence or absence of TGFβ1 at indicated concentrations for indicated time points. In some experiments, macrophages and DCs were used as APCs for induction of Foxp3<sup>+</sup> T<sub>reg</sub> cells in culture. The cells were then analyzed by real-time PCR for Foxp3, TβR I and TβRII mRNA expression or Foxp3, IL17, Annexin V, 7-AAd, and Ki-67 expressions by flow cytometric analysis. In some experiments, TGF-β1 and IL-6 were added into the T cell cultures and cells were collected for IL-17 and RORγt mRNA expression. IL-17 protein in CD4<sup>+</sup> T cells were determined by intracellular IL-17 staining by flow cytometry and ELISA analysis for IL17 cytokine in the culture supernatants.

**Mixed bone marrow chimeras.** Bone marrow was isolated from 6 to 8 weeks old PARP-1<sup>-/-</sup> or PARP-1<sup>+/+</sup> mice (CD45.2<sup>+</sup>, C57BL/6), or age-matched C57BL/6 CD45.1<sup>+</sup> wild type mice. Bone marrow was depleted of T cells by mouse CD90.2 microbeads. Rag1<sup>-/-</sup> recipient mice were sublethally irradiated (4.5G) and reconstituted with a mixture of PARP-1<sup>+/+</sup> or PARP-1<sup>-/-</sup> bone marrow (1×10<sup>6</sup> cells) and CD45.1 bone marrow (1×10<sup>6</sup> cells) in 1:1 ratio. Five weeks after reconstitution, the cells from thymus and spleen were collected and analyzed by flow cytometry.

**Flow cytometric analysis.** Flow cytometric analysis was performed as described before (5). Briefly, thymus, spleen and lymph node were gently meshed in complete DMEM containing 10% FBS (BioWhittaker) for single cell suspension. The cells were washed using PBS containing 0.5% BSA for 10 min at 300g, and then resuspended in staining buffer for cytometric analysis with antibodies against CD4, CD8, CD25 and intracellular Foxp3, IL17 and ROR $\gamma$ t. The stained cells were analyzed on FACSCalibur flow cytometry.

**Real-time PCR.** Real-time RT-PCR was done as described <sup>2</sup>. Mouse *Foxp3*, *Tgfbr1*, *Tgfbr2* and *Hprt* and human *Foxp3*, *Tgfbr1*, *Tgfbr2*, *Rorc* and GAPDH were analyzed with TaqMan gene expression assay kit. The following primers were from Applied Biosystems: mouse *foxp3*, Mm00475156; *Tgf  $\beta$  r1*, Mm03024015; *Tgf  $\beta$  r2*, Mm03024091; *Hprt*, Mm00446968. Human *Tgf  $\beta$  r1*, Hs00610320; *Tgf  $\beta$  r2*, Hs00234253; *Rorc* Mm01261019; *GAPDH*, Hs99999905.

**Chromatin immunoprecipitation (ChIP) assay.** ChIP assay was done as described (5). Freshly isolated CD4<sup>+</sup>CD25<sup>-</sup> cells or cells stimulated with plate-bounded anti-CD3 and soluble anti-CD28 with TGF- $\beta$  1 for 30 min were used. Processed chromatin was incubated with 4 $\mu$ g mouse PARP-1 or Smad3 antibodies or their respective isotype-matched control antibody. Immunoprecipitated DNA was analyzed by SYBR Green Real-time PCR detection system. The results were normalized with chromatin that was not treated with antibodies as the input control. PCR primers for the detection of regions were as follows: Foxp3 5' - CATGTTGGCTTCCAGTCTCCTT-3' (forward) and 5' - CCACACTTTTGACCTCTGCAGTA-3' (reverse). T $\beta$ RI and T $\beta$ RII primers were listed in supplementary figure 5a.

**Luciferase assay.** The mouse T $\beta$ RI (+1 to -1183) and T $\beta$ RII (+101 to -1023) promoter were synthesized (GenScript) and inserted into pGL4 basic vector. EL4/LAF cells were transfected with reporter construct together with PARP-1 expressing pCMV-SPORT6 vector (Thermo Scientific) or control pCMV-SPORT6 vector by using Nucleofector L kit (LONZA). After 18 hr, the cells were stimulated with anti-CD3 (1  $\mu$ g/mL) and anti-CD28 (1  $\mu$ g/mL) in the presence or absence of TGF- $\beta$ 1 (2 ng/mL) for 24h. The T $\beta$ RI or T $\beta$ RII promoter activity was determined by a dual-luciferase assay system (Promega) according to manufacturer's instruction. Transfections were normalized with the pRL-TK vector (Promega) as an internal

control and the results were shown as (firefly luminescence - background) / (renilla luminescence - background).

**Oral tolerance.** OTII transgenic PARP-1<sup>+/+</sup> or PARP-1<sup>-/-</sup>CD4<sup>+</sup>CD25<sup>-</sup> T cells (CD45.1<sup>+</sup>) were adoptively transferred to C57BL/6 mice (CD45.2<sup>+</sup>). Recipient mice were fed with 1.5% OVA protein in drinking water for 5 consecutive days. The drinking water was replaced every 48 hours. On day 6, spleen, lymph nodes (axillary, brachial, mesenteric, and peyer's patches), *lamina propria* lymphocytes (LPLs) were collected, and Foxp3 expression was assessed in transferred cells by flow cytometric analysis.

**Immunoblot analysis.** Immunoblot analysis was done as described <sup>2</sup>. The following antibodies were used: antibodies to phospho-Smad2 (S465/467), Smad2 (L16D3) and GAPDH.

**Isolation of subsets of human CD4<sup>+</sup> T cells and cell culture** Human peripheral blood mononuclear cells (PBMC) were obtained by leukopheresis of normal volunteers at the Department of Transfusion Medicine at the National Institutes of Health (NIH, Bethesda, MD). The CD4<sup>+</sup>CD25<sup>-</sup> T cells were isolated using the human T regulatory isolation kit <sup>18</sup>. Purified cells were pre-incubated with 5-AIQ for 20 mins, cells were stimulated with human anti-CD3 and CD28 antibodies in X-VIVO 20 medium for the indicated time for real-time PCR analysis.

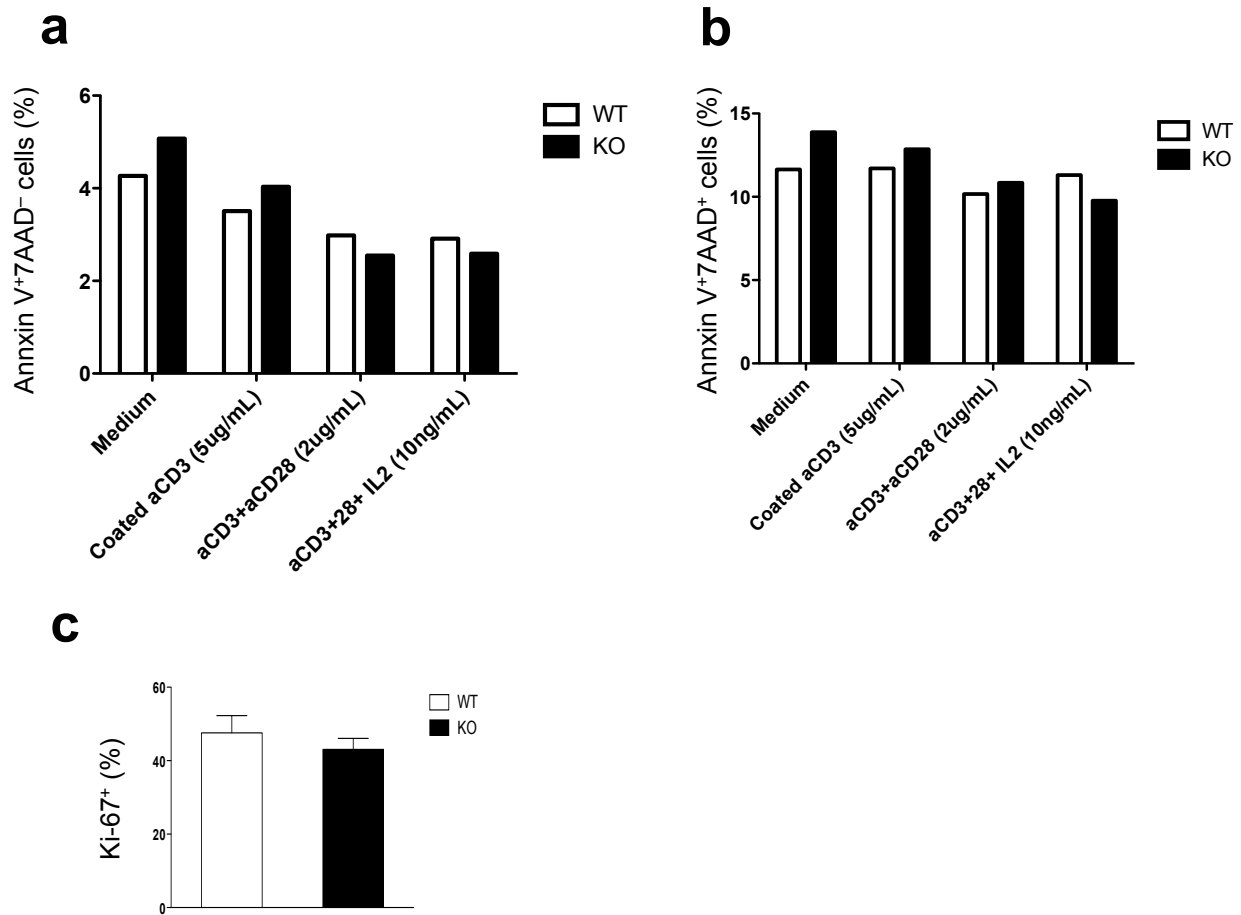

**Supplementary Fig. 1 Analysis of Tregs apoptosis and proliferation. (a-b)** Staining of 7AAD versus Annexin V on 1 day cultured CD4<sup>+</sup>CD25<sup>+</sup> Tregs of PARP-1<sup>-/-</sup> or PARP-1<sup>+/+</sup> littermate control mice at indicated conditions. Data are representative of three independent experiments. **(c)** Staining of Ki-67 on CD4<sup>+</sup> CD25<sup>+</sup> Foxp3<sup>+</sup> Tregs in spleens of PARP-1<sup>-/-</sup> or PARP-1<sup>+/+</sup> littermate control mice. The mice shown in the figure were on sv/129 x C57BL6 background.

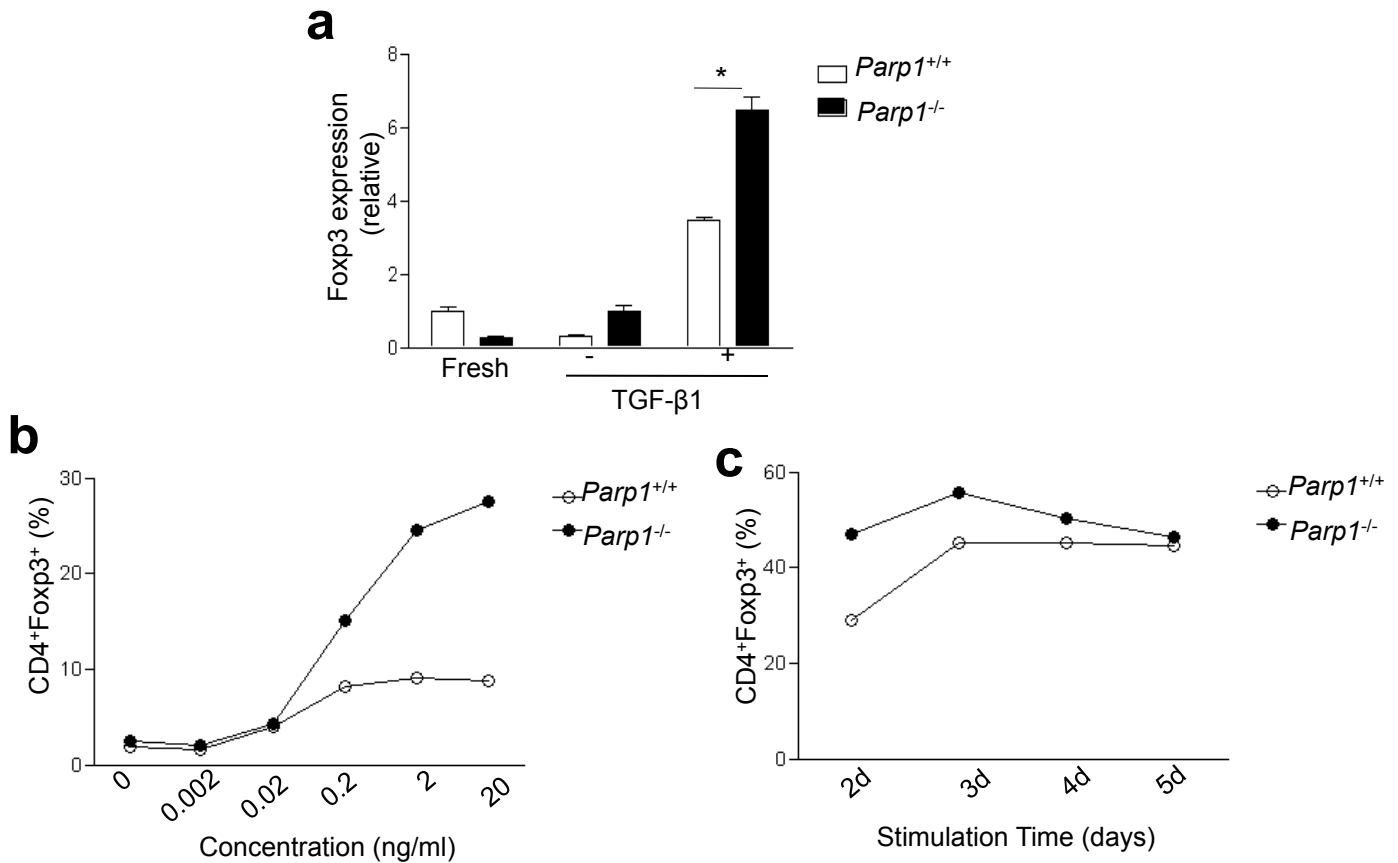

**Supplementary Fig 2. Greater Foxp3 induction in PARP-1<sup>-/-</sup> CD4<sup>+</sup> T cells *in vitro*.** (a) Quantitative PCR analysis of *Foxp3* gene expression in CD4<sup>+</sup>CD25<sup>-</sup> T cells which were cultured for 24 hrs in absence or presence of TGF-β1. Data are representative of two experiments (mean ± s.e.m). (b) The frequency of Foxp3<sup>+</sup> T<sub>regs</sub> analyzed by flow cytometry following culture of CD4<sup>+</sup>CD25<sup>-</sup> T cells with a anti-CD3 antibody, irradiated CD4<sup>+</sup> depleted APCs and different dose of TGF-β1. Data are representative of more than four experiments. (c) The frequency of Foxp3<sup>+</sup> Tregs analyzed by flow cytometry following culture of CD4<sup>+</sup>CD25<sup>-</sup> T cells with anti-CD3 antibody, irradiated CD4<sup>+</sup> depleted APCs and TGF-β1(2ng/ml) analyzed at the indicated time points of culture. Data is representative of three experiments. The mice shown in the figure were on sv/129 x C57BL6 background. \**P*<0.05.

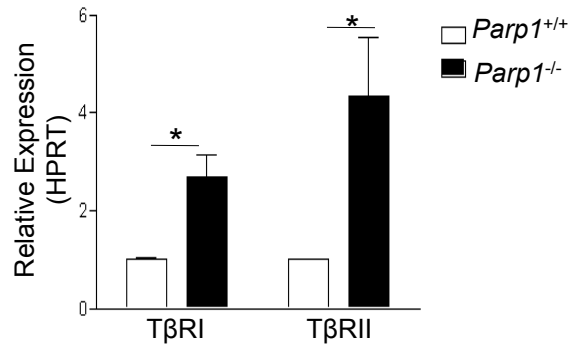

**Supplementary Fig 3. Increased TβRI and TβRII expressions in CD4<sup>+</sup>CD25<sup>-</sup> T cells of PARP-1<sup>-/-</sup> mice on the sv/129 x C57BL6 background.** Quantitative PCR analysis of the expression of TβRI and TβRII in freshly isolated splenic CD4<sup>+</sup>CD25<sup>-</sup> T cells of PARP-1<sup>-/-</sup> mice and PARP-1<sup>+/+</sup> littermate control mice on sv129 x C57BL6 background. \**P*<0.05.

**a**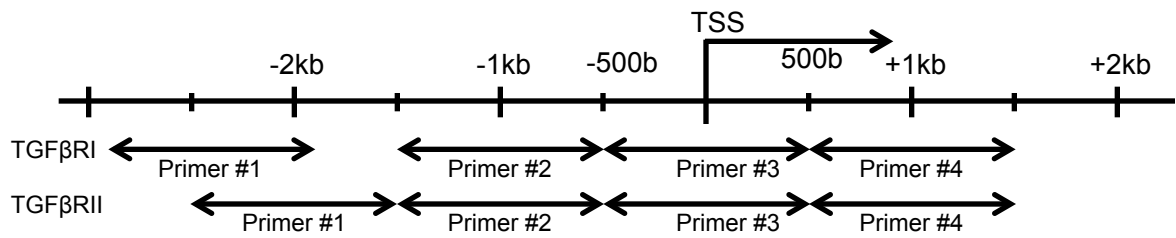

|                 |         | TGFβRI (5' --> 3')       | TGFβRII (5' --> 3')   |
|-----------------|---------|--------------------------|-----------------------|
| #1              | Forward | TGTTTTCAGATCTGTAGCTCATGG | TGAGGGAGACAGGCTGAGTT  |
|                 | Reverse | TGTGTTCACTTGGAAACTGAGGA  | CTCAAGGGATGGCAGTAGCC  |
| #2              | Forward | TCTGGAGCTCATTTTGGCGT     | GTGGTGGAGTCTGCTTTTCAA |
|                 | Reverse | AGCGGGAGCAGTCATAGGTA     | ATAGCCTTTCTACCTCCAGCC |
| #3<br>(Fig. 2f) | Forward | ACGTCGTCCGACGCTCCTCA     | TGAGCAGGAGGCTGGGGCTC  |
|                 | Reverse | AAAGAGCTGAAGCGAGCCAGAG   | TCTCGGCGCCCGGGTAAAGT  |
| #4              | Forward | GCAAAATACTGAGGCTCGGC     | ACTGAGGCCAGAGTCATGT   |
|                 | Reverse | TGGAGAGACTTTTGTGGCT      | CCCATCGCAGGGGTAGTTA   |

**b**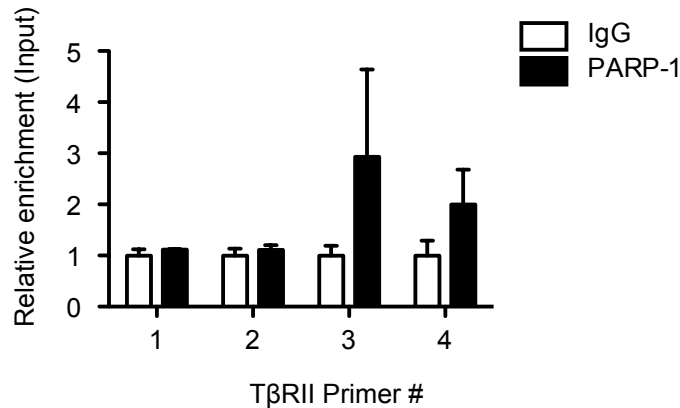

**Supplementary Fig 4. Increased binding of PARP-1 at TβRII gene regions from -500bp to 1kb from Transcriptional Starting Site (TSS).**

(a) Illustration of the primer binding sites on TβRI and TβRII genes in the ChIP assays. (b) ChIP-coupled quantitative PCR analysis of PARP-1 enrichment at some regions at TβRII genes from -2 kb to +1kb from Transcriptional Starting Site (TSS). Graph shows the relative enrichment of PARP-1 binding to the regions recognized by TβRII primers 1, 2, 3, and 4.



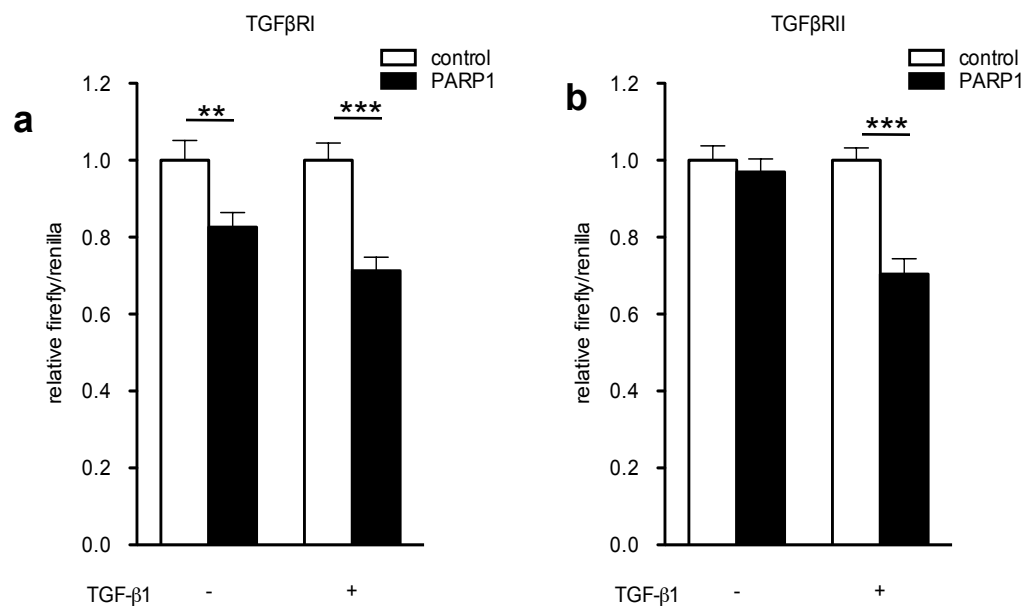

**Supplementary Fig 5. PARP-1 over expression suppresses the promoter activity of TβRI and TβRII after TGF-β1 stimulation.** The mouse TβRI (+1 to -1183) and TβRII (+101 to -1023) promoter were synthesized (GenScript) and inserted into pGL4 basic vector. EL4/LAF cells were transfected with reporter construct together with PARP-1 expressing pCMV-SPORT6 vector (Thermo Scientific) or control pCMV-SPORT6 vector by using Nucleofector L kit (LONZA). After 18 hrs, the cells were stimulated with anti-CD3 (1 μg/mL) and anti-CD28 (1 μg/mL) antibodies in the presence or absence of TGF-β1 (2 ng/mL) for 24 hrs. The TβRI (**a**) or TβRII (**b**) promoter activity was determined by a dual-luciferase assay system. Transfections were normalized with the pRL-TK vector as an internal control and the results were shown as (firefly luminescence - background) / (renilla luminescence - background). Graphs show mean ± SD of triplicate wells. Data is representative of three independent experiments. \*\*p<0.01, \*\*\*p<0.002.

Supplementary Fig. 5

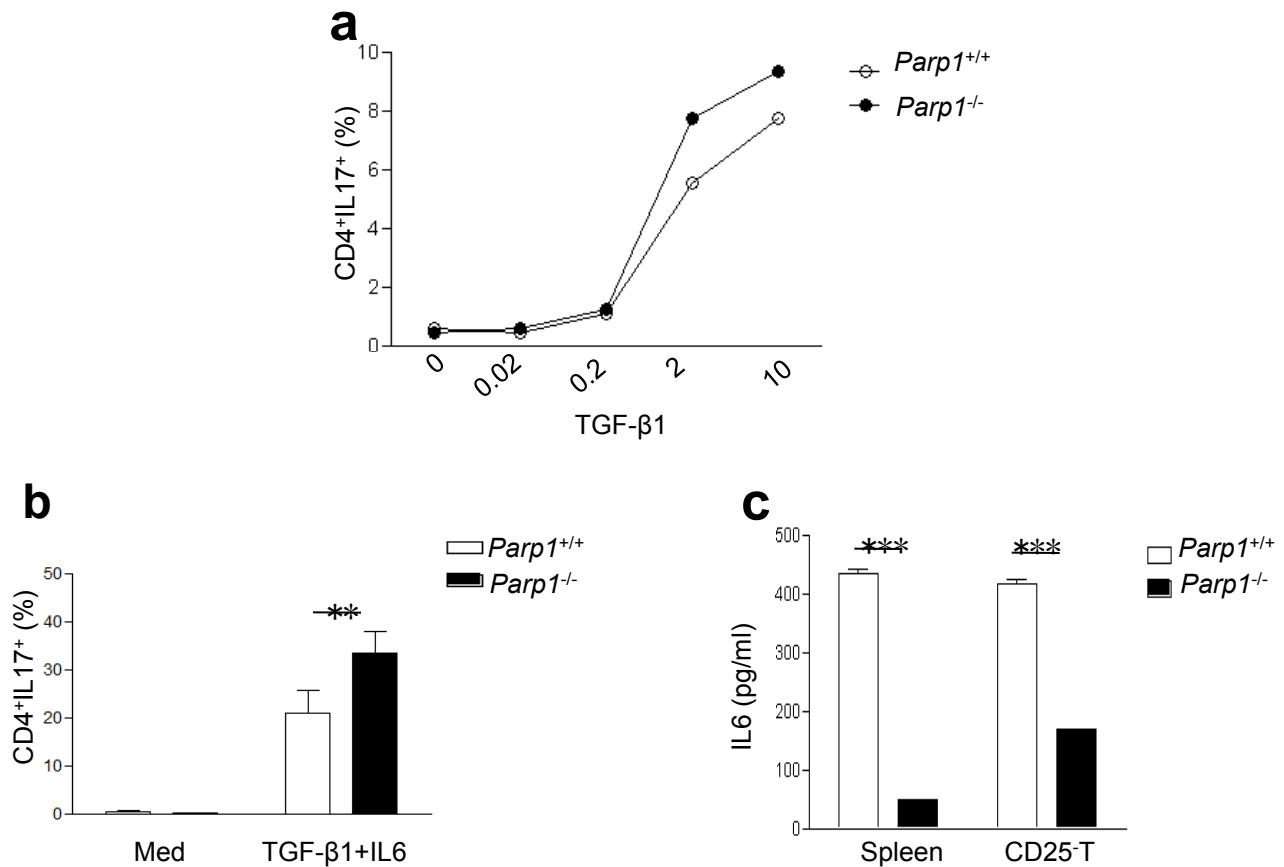

**Supplementary Fig 6. Greater induction of Th17 cells in PARP-1<sup>-/-</sup> CD4<sup>+</sup> T cells *in vitro*.** (a) The percentage of IL17<sup>+</sup> cells in CD4<sup>+</sup> population analyzed by flow cytometry. CD4<sup>+</sup>CD25<sup>-</sup>T from PARP-1<sup>-/-</sup> or PARP-1<sup>+/+</sup> mice on C57BL/6 background were stimulated with anti-CD3 antibody and irradiated PARP-1<sup>+/+</sup> CD4<sup>+</sup> depleted APCs at different doses of TGFβ-1 plus IL-6 (50ng/ml). (b) The percentage of IL17<sup>+</sup> cells in CD4<sup>+</sup> population of PARP-1<sup>-/-</sup> or PARP-1<sup>+/+</sup> littermate controls on sv/129 x C57BL6 background which were stimulated with anti-CD3 antibody and irradiated PARP-1<sup>+/+</sup> CD4<sup>+</sup> depleted APCs in the absence (Med) or presence of TGFβ-1 plus IL6 (TGFβ1+IL6) for 4 days. Data are representative of more than three independent experiments. (c) IL-6 concentration determined by ELISA in supernatants from either whole splenocytes or CD4<sup>+</sup>CD25<sup>-</sup> T cells from PARP-1<sup>-/-</sup> or PARP-1<sup>+/+</sup> littermate controls on sv/129 x C57BL6 background which were stimulated with anti-CD3 antibody for three days. Data are representative of three to four independent experiments. \*\*\**P*<0.001.
